# Supplementary material for: Hawthorn flavonoid ameliorates cognitive deficit in mice with Alzheimer's disease by increasing the levels of Bifidobacteriales in gut microbiota and docosapentaenoic acid in serum metabolites
Source: Royal Society of Chemistry journal article supplement (doi:10.1039/d2fo02871a), 2022-01-01

**Figure S1.** Diagram of LC-MS composition analysis of hawthorn flavonoids. Positive ion chromatogram of hawthorn flavonoid (A), negative anion chromatogram of hawthorn flavonoid (B).

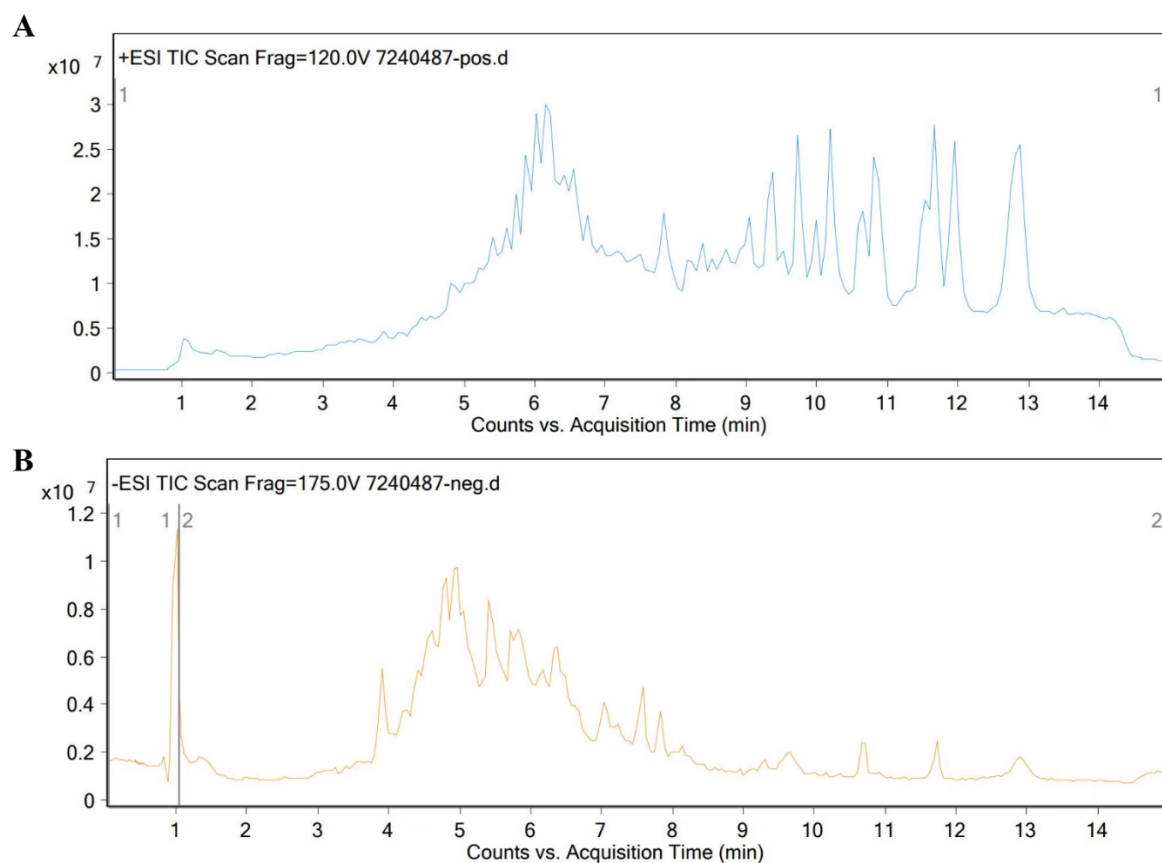

Supplement: d2fo02871a1.pdf [file d2fo02871a1.pdf]
